# Supplementary material
Source: PubMed Central journal article supplement (PMC4643671)
Supplement: NIHMS722141-supplement-SI.pdf [file NIHMS722141-supplement-SI.pdf]

## Supporting Information

**Title:** Activation of Two Sequential H-transfers in the Thymidylate Synthase Catalyzed Reaction

**Author list:** Zahidul Islam,<sup>1</sup> Timothy S. Strutzenberg,<sup>1</sup> Ananda K. Ghosh<sup>1</sup> and Amnon Kohen<sup>1\*</sup>

### Corresponding Author

\* To whom correspondence may be addressed. Professor Amnon Kohen, Department of Chemistry, The University of Iowa, Iowa City, IA 52242, U.S.A. Tel.: +1 319 335 0234; e-mail: [amnon-kohen@uiowa.edu](mailto:amnon-kohen@uiowa.edu).

### Institution Address:

<sup>1</sup> The Department of Chemistry, The University of Iowa, Iowa City, IA 52242, U.S.A.

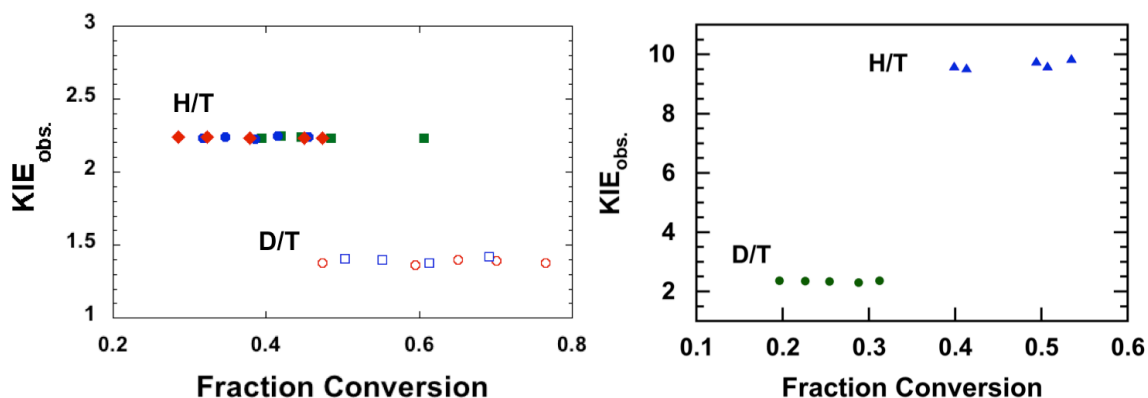

**Figure S1:** Observed KIEs for the WT (left) and R166K (right). Independent experiments are presented by different colors for the WT. The left panel was reproduced from the ref 1 with the permission from ACS.

**Table S1:** Observed and Intrinsic KIEs on the proton abstraction catalyzed by R166K.

|       | H/T <sub>obs</sub> | D/T <sub>obs</sub> | H/T <sub>int</sub> |
|-------|--------------------|--------------------|--------------------|
| 5 °C  | 10.99±0.08         | 2.63±0.08          | 41.15±1.86         |
| 15 °C | 9.66±0.27          | 2.37±0.03          | 25.11±1.47         |
| 25 °C | 5.23±0.07          | 1.90 ±0.03         | 13.38±1.2          |
| 35 °C | 3.10±0.09          | 1.56±0.02          | 7.70±1.09          |

**Table S2:** Observed and Intrinsic KIEs on the hydride transfer catalyzed by R166K.<sup>2</sup>

|       | H/T <sub>obs</sub> | D/T <sub>obs</sub> | H/T <sub>int</sub> |
|-------|--------------------|--------------------|--------------------|
| 5 °C  | 5.74±0.02          | 2.00±0.02          | 16.99±1.06         |
| 15 °C | 6.43±0.10          | 1.97±0.01          | 13.50±0.58         |
| 25 °C | 6.31±0.10          | 1.89±0.009         | 10.66±0.37         |
| 35 °C | 6.09±0.02          | 1.80±0.04          | 9.19±1.22          |

**References:**

- (1) Wang, Z.; Kohen, A. *J. Am. Chem. Soc.* **2010**, *132*, 9820-9825.
- (2) Islam, Z.; Strutzenberg, T. S.; Gurevic, I.; Kohen, A. *J. Am. Chem. Soc.* **2014**, *136*, 9850-9853.
